# Supplementary material for: Stem cell–homing biomimetic hydrogel promotes the repair of osteoporotic bone defects through osteogenic and angiogenic coupling
Source: PubMed Central journal article supplement — Sci Adv. 2024 Nov 1;10(44):eadq6700. doi: 10.1126/sciadv.adq6700 (PMC11529719; doi:10.1126/sciadv.adq6700), 2024-11-01
Supplement: sciadv.adq6700_sm.pdf [file sciadv.adq6700_sm.pdf]

Supplementary Materials for  
**Stem cell–homing biomimetic hydrogel promotes the repair of osteoporotic  
bone defects through osteogenic and angiogenic coupling**

Fei-Long Wei *et al.*

Corresponding author: Cheng-Pei Zhou, [zhoucpei@fmmu.edu.cn](mailto:zhoucpei@fmmu.edu.cn); Ji-Xian Qian, [pasmiss2012@163.com](mailto:pasmiss2012@163.com);  
Zheng Guo, [guozheng@fmmu.edu.cn](mailto:guozheng@fmmu.edu.cn); Quan-You Gao, [18009129090@163.com](mailto:18009129090@163.com)

*Sci. Adv.* **10**, eadq6700 (2024)  
DOI: 10.1126/sciadv.adq6700

**This PDF file includes:**

Figs. S1 to S7  
Tables S1 and S2

## Supplementary Information

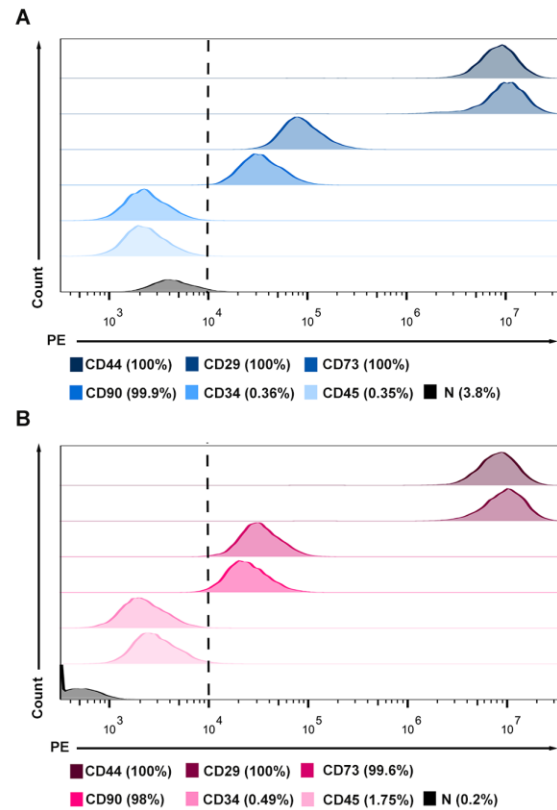

**Fig. S1. Identification of BMSCs from different groups by flow cytometry.**

(A) Flow cytometry showed BMSCs from osteoporotic rats were positive for CD44 (100%), CD29 (100%), CD73 (100%), and CD90 (99.9%), negative for CD34 (0.36%) and CD45 (0.35%). (B) Flow cytometry showed BMSCs from osteoporotic rats were positive for CD44 (100%), CD29 (100%), CD73 (99.6%), and CD90 (98%), negative for CD34 (0.49%) and CD45 (1.75%).  $n = 3$  for each group.

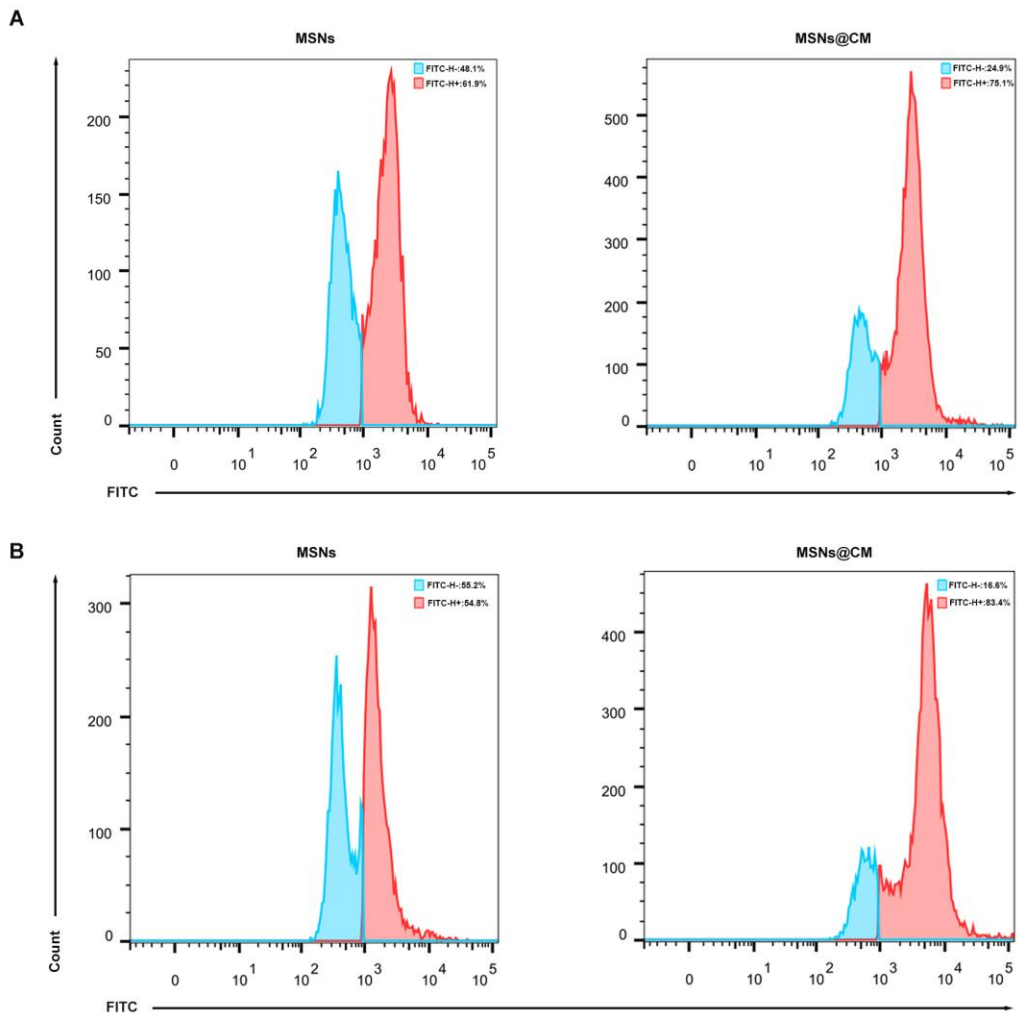

**Fig. S2. Analyzing the impact of cell membrane coverage on MSNs.**

(A) Flow cytometric analysis of MSNs (coated by BMSCs and HUVECs membranes) uptake by BMSCs. (B) Flow cytometric analysis of MSNs (coated by BMSCs and HUVECs membranes) uptake by HUVECs.

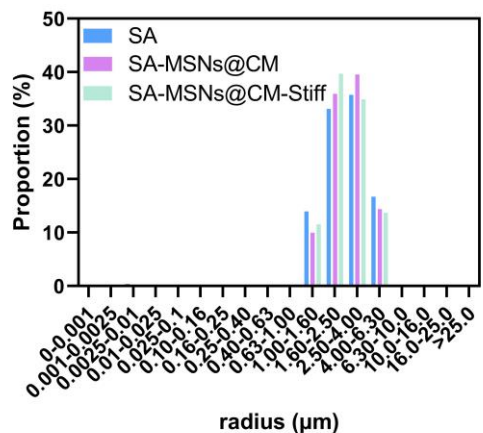

**Fig. S3. Pore size distributions of SA, SA-MSNs@CM and SA-MSNs@CM-Stiff.** The pore size distribution of SA, SA-MSNs@CM and SA-MSNs@CM-Stiff was measured by low-frequency magnetic resonance.

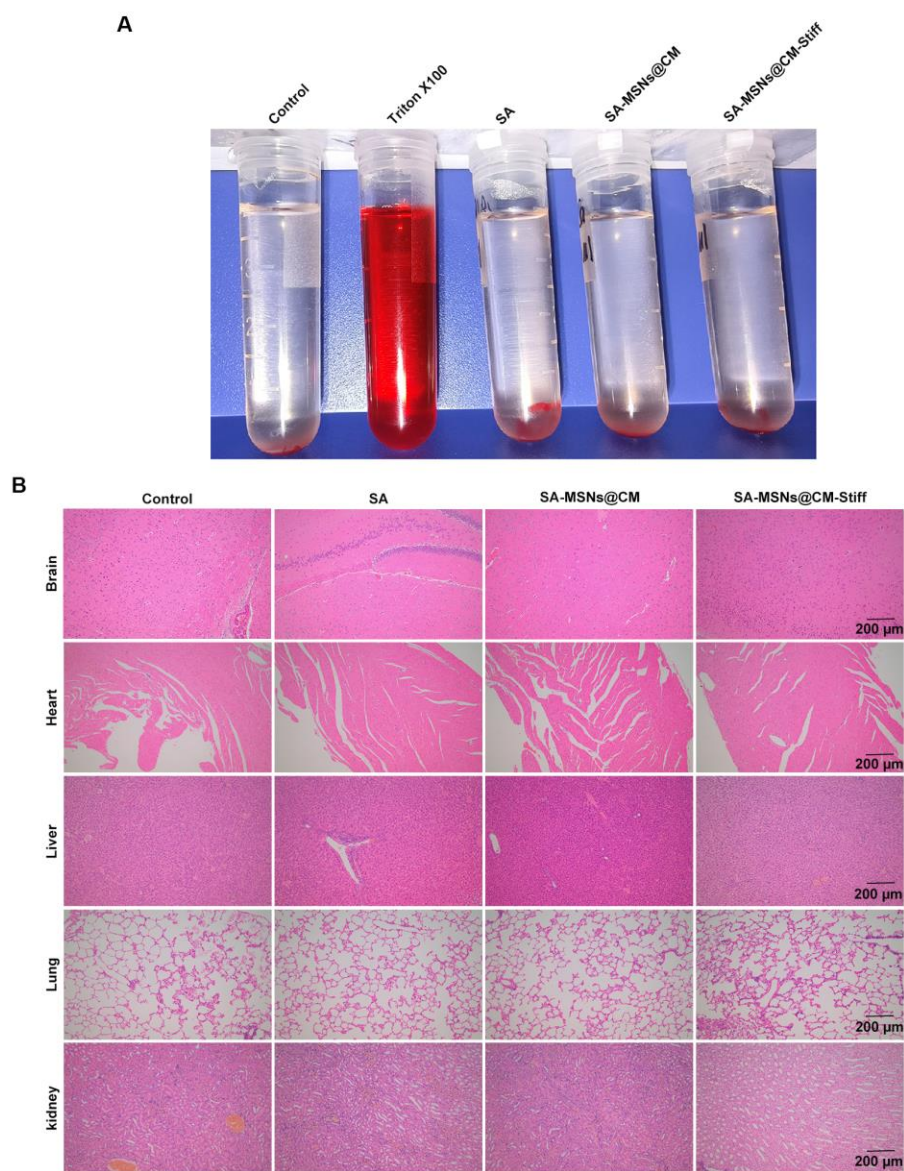

**Fig. S4. Hydrogels biocompatibility testing.**

(A) Erythrocyte haemolysis assay to evaluate the biocompatibility of the hydrogel. (B) Hematoxylin and eosin staining and histological analysis of main organs from hydrogels-treated rats. n = 3 for each group.

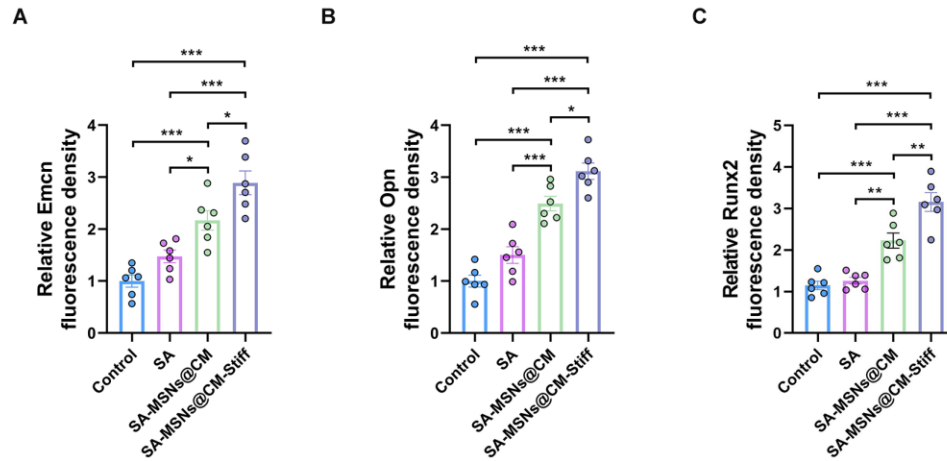

**Fig. S5. SA-MSNs@CM-Stiff induces BMSCs recruitment and promotes osseointegration *in vivo*.**

(A) Relative Emcn fluorescence density (Statistical analysis for Figures 8G). (B) Relative Opn fluorescence density (Statistical analysis for Figures 8H). (C) Relative Runx2 fluorescence density (Statistical analysis for Figures 8I).  $n = 6$  for each group. Error bars denote mean  $\pm$  SEM; ns, no significance;  $*p < 0.05$ ,  $**p < 0.01$ , and  $***p < 0.001$ .

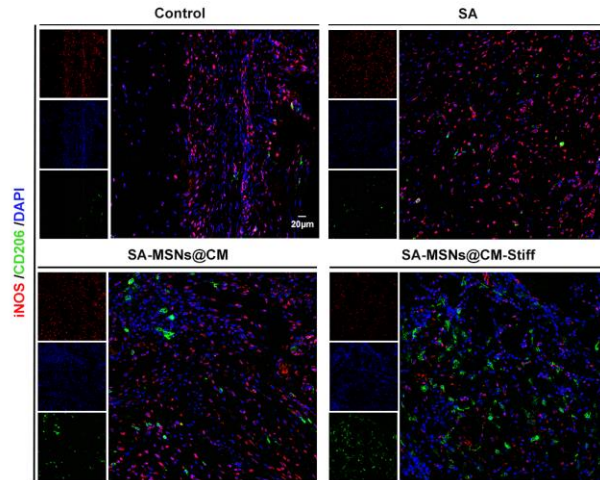

**Fig. S6. SA-MSNs@CM-Stiff regulates macrophage polarization *in vivo*.** Representative immunofluorescence staining of iNOS and CD206 in the femoral condyle of an osteoporotic rat eight weeks after hydrogel implantation (scale bar: 20 μm); n = 6.

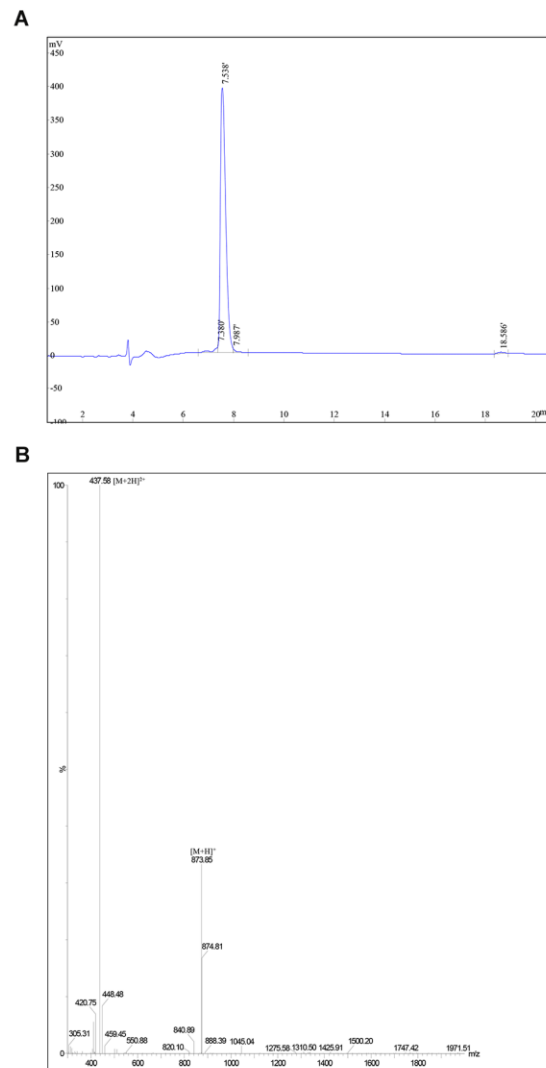

**Fig. S7. Analytical HPLC trace and electrospray ionization mass spectrometry (ESI-MS) analysis of bone marrow-homing peptide.**

(A) Analytical HPLC trace of bone marrow-homing peptide. (B) ESI-MS analysis of bone marrow-homing peptide.



**Table S1. Primary antibodies information for western blotting.**

| <b>Antibody</b> | <b>Host</b> | <b>Dilution ratio</b> | <b>Company</b>    | <b>Item number</b> |
|-----------------|-------------|-----------------------|-------------------|--------------------|
| anti-Nanog      | Rabbit      | 1:1000                | ProteinTech       | 14295-1-AP         |
| anti-Sox2       | Rabbit      | 1:1000                | ProteinTech       | 11064-1-AP         |
| anti-Oct4       | Rabbit      | 1:1000                | ProteinTech       | 11263-1-AP         |
| anti-P21        | Rabbit      | 1:1000                | ProteinTech       | 10355-1-AP         |
| anti-P53        | Rabbit      | 1:1000                | ProteinTech       | 10442-1-AP         |
| anti-P16        | Rabbit      | 1:600                 | ProteinTech       | 10883-1-AP         |
| anti-eNOS       | Rabbit      | 1:1000                | ABclonal          | A20985             |
| anti-p-eNOS     | Rabbit      | 1:1000                | ProteinTech       | 28939-1-AP         |
| anti-sGC        | Rabbit      | 1:1000                | ProteinTech       | 11936-1-AP         |
| anti-PKG        | Rabbit      | 1:1000                | ProteinTech       | 21646-1-AP         |
| anti-Runx2      | Rabbit      | 1:1000                | Abways Technology | CY5864             |
| anti-Opn        | Rabbit      | 1:1000                | ProteinTech       | 25715-1-AP         |
| anti-CD31       | Mouse       | 1:1000                | ProteinTech       | 66065-2-Ig         |
| anti-Emcn       | Rabbit      | 1:1000                | Invitrogen        | PA5-115178         |
| anti-CD86       | Rabbit      | 1:1000                | ProteinTech       | 13395-1-AP         |
| anti-CD206      | Rabbit      | 1:1000                | ProteinTech       | 18704-1-AP         |
| anti-Gapdh      | Rabbit      | 1:1000                | ProteinTech       | 60004-1-Ig         |

**Table S2. Primary antibodies information for Immunofluorescence.**

| Antibody             | Host   | Dilution ratio | Company.          | Item number |
|----------------------|--------|----------------|-------------------|-------------|
| anti- $\gamma$ -H2AX | Rabbit | 1:200          | Abcam             | ab81299     |
| anti-Runx2           | Rabbit | 1:200          | Abways Technology | CY5864      |
| anti-Opn             | Rabbit | 1:200          | ProteinTech       | 25715-1-AP  |
| anti-CD90            | Mouse  | 1:200          | Invitrogen        | 14-0900-81  |
| anti-CD31            | Mouse  | 1:1000         | ProteinTech       | 66065-2-Ig  |
| anti-Emcn            | Rabbit | 1:1000         | Invitrogen        | PA5-115178  |
| anti-CD68            | Mouse  | 1:200          | ProteinTech       | 66231-2-Ig  |
| anti-CD86            | Rabbit | 1:200          | ProteinTech       | 13395-1-AP  |
| anti-CD206           | Rabbit | 1:200          | ProteinTech       | 18704-1-AP  |
| anti-iNOS            | Mouse  | 1:50           | Invitrogen        | MA5-47726   |
